# Supplementary material
Source: PubMed Central journal article supplement (PMC5986248)
Supplement: supp_RA117.000417_133283_1_supp_68458_p3lq3x.pdf [file supp_RA117.000417_133283_1_supp_68458_p3lq3x.pdf]

Quantitative Phosphoproteomic and Metabonomic Analyses Reveal GmMYB173

Optimizes Flavonoid Metabolism in Soybean to Survive Salt Stress

Erxu Pi, Chengmin Zhu, Wei Fan, Yingying Huang, Liqun Qu, Yangyang Li, Qinyi

Zhao, Lijuan Qiu, Huizhong Wang, B. W. Poovaiah & Liqun Du

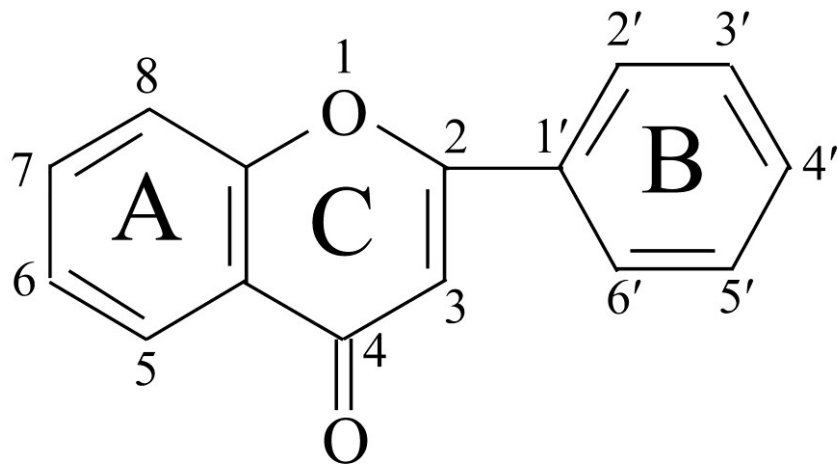

**Supplementary Figure S1.** General structure of flavonoids.

|     |     |     |     |     |     |     |     |
|-----|-----|-----|-----|-----|-----|-----|-----|
| 113 | 114 | 115 | 116 | 117 | 118 | 119 | 121 |
| C1  | C2  | C3  | C4  | T1  | T2  | T3  | T4  |

**Supplementary Figure S2.** Sample set of quantitative phosphoproteomic analysis.

One eight-plex iTRAQ set was used for analyzing the four biological replications of control (C1~C4) and NaCl treated (T1~T4) groups of soybean roots.
